# Supplementary material
Source: Royal Society of Chemistry journal article supplement (doi:10.1039/d6mh00713a)
Supplement: d6mh00713a1.pdf [file d6mh00713a1.pdf]

**Supplementary Material**

**Novel Chiral-Driven Stereoisomerism Dimension of Fire  
Safety and Crystallization Mechanisms in Poly(lactic acid)**

Xue-Min Yang <sup>a</sup>, Jin-Xiang Lv <sup>b</sup>, Kathrin Harre <sup>a</sup>, and Dan Xiao <sup>a\*</sup>

<sup>a</sup> Fakultät Landbau/Umwelt/Chemie, Hochschule für Technik und Wirtschaft Dresden,  
Friedrich-List-Platz 1, D-01069 Dresden, Germany

<sup>b</sup> Department of Materials Science and Engineering, Fujian University of Technology,  
Fuzhou, Fujian, 350108, China

Corresponding author:

\*Email: [xiaodan2014@gmail.com](mailto:xiaodan2014@gmail.com),

## Methods

### Materials

The (S)-(+)-1,1'-binaphthyl-2,2'-diyl hydrogen phosphate (L (+)), and (R)-(-)-1,1'-binaphthyl-2,2'-diyl hydrogen phosphate (R (-)) were obtained from Aladdin company (China). PLLA (3052D, a density of 1.24g/cm<sup>3</sup>) was purchased from Nature Work. PDLA (D120) (stereochemical purity  $\geq 99\%$ , a density of 1.24g/cm<sup>3</sup>, flow index of 25g/10min at 210 °C) were purchased from Total Corbin Co., Ltd. (Thailand). PMLA was the mixture of PLLA (L130) and PDLA (D120) (mass ratio was 1 :1) in our laboratory.

### Fabrication of right (R (-)) and left (L (+)) chiral flame retardants for bio-based polylactide (PLA)

First of all, the raw materials (PLLA (L130), PDLA (D120), (R)-(-)-1,1'-binaphthyl-2,2'-diyl hydrogen phosphate (R (-)) and (S)-(+)-1,1'-binaphthyl-2,2'-diyl hydrogen phosphate (L (+)) were dried firstly. According to the formula in Table 1S (Supporting Information), the functional PLA composites were processed at a speed of 70rpm at 175 °C for 7 minutes. Then, the different sizes of functional PLA composites were formed using a CREE-6014A-30 Heat Press for the standard testing at 190 °C.

### Characterizations

TGA testing was investigated by a TGA/DSC 200F3 Netzsch over the temperature range of 40–700 °C under N<sub>2</sub> at 10 K·min<sup>-1</sup>. SEM combined with EDS was examined by NovaNano 450 T and JEOL JSM-6700F measurement. The UL-94 vertical burning (13 mm × 130 mm × 3 mm) measurement was conducted on a CZF-2 Jiangning instrument in accordance with ASTM D 3801 standard. LOI (6.5 mm × 120 mm × 3 mm) measurement was investigated by a JF-3 Jiangning instrument in accordance with ASTM D2863 standard. Cone-calorimeter (100 mm × 3 mm × 100 mm) measurement was investigated by a FTT instrument (35 kW/m<sup>2</sup>, Britain) in accordance with ISO 5660-1 standard. Differential scanning calorimetry (DSC) measurement was investigated by a Netzsch instrument. First of all, the temperature for non-isothermal testing was raised from 35 to 200 °C under N<sub>2</sub> at 10 K·min<sup>-1</sup>. Then the temperature for non-isothermal testing dropped from 200 to 35°C. Afterwards, the temperature for non-isothermal testing was raised to 200 °C. The crystalline degree (X<sub>c</sub>) was obtained from the following equation:

$$X_c = \frac{\Delta H_m}{(1 - \varphi) \Delta H_m^0} \times 100\%$$

For isothermal crystallization testing, the specimen (5-10 mg) was firstly treated with the same procedure at 80 K·min<sup>-1</sup> to eliminate thermal history on a DSC 200F3 Netzsch under N<sub>2</sub>, and then cooled to a predetermined temperature (100°C, 105°C, 110°C, 115°C) and record the

curve of isothermal crystallization. Polarizing optical microscope (POM) was conducted on a DM 2700P LEICA instrument. X-ray powder diffractometer (XRD) measurement was conducted on a D8ADVANCE instrument. Carbon residues were recorded by a Dajiang digital camera instrument. SEM testing of carbon residues was recorded by a JEOL JSM-6700F measurement. XPS and Raman measurements were conducted on a PHI5300 spectrometer and Fisher DxRxi instruments. TG-FTIR measurement was recorded by the TG209F1 measurement at 10 K·min<sup>-1</sup> under 40–750 °C combined with Vertex70 instrument from 4000 to 400 cm<sup>-1</sup> measurements under N<sub>2</sub>. Py-GCMS measurement was recorded by using an Agilent 5977 B combined with 8790 B instruments under N<sub>2</sub>.

## 1. Fig. Captions

**Fig. S1.** The SPR curves of PLA/5% R (-) and PLA/5% L (+) compounds

**Fig. S2.** The COP curves of PLA/5% R(-) and PLA/5% L(+) compounds

**Fig. S3.** The weight loss curves of PLA/5%R(-) and PLA/5%L(+) compounds

**Fig. S4.** Crystallization curves of PDLA with R(-)/L(+) compounds (a), PLLA with R(-)/L(+) compounds (b) and PMLA with R(-)/L(+) compounds (c)

**Fig. S5.** The crystallinity of PLA with R(-) or PLA/L(+) compounds. Melting behaviors of PDLA with R(-)/L(+) compounds (a), PLLA with R(-)/L(+) compounds (b) and PMLA with R(-)/L(+) compounds (c). The isothermal crystallinity of PLA with R(-) or PLA/L(+) compounds at different temperatures (d1-e4). The curves  $\ln(-\ln(1-X(t)))$  and  $\ln(t)$  of PLA with R(-) or PLA/L(+) compounds at different temperatures (f1-g4)

**Fig. S6.** TGA (a) and DTG (b) curves of PDLA with R(-)/L(+), PLLA with R(-)/L(+) and PMLA with R(-)/L(+) compounds

**Fig. S7.** The morphology of the R (-) or L (+) flame retardants in PLA. The SEM images of PDLA (a), PDLA/5%R(-) (d), PDLA/5%L(+) (g), PLLA (b), PLLA/5%R(-) (e), PDLA/5%L(+) (h), PMLA (c), PMLA/5%R(-) (f), PMLA/5%L(+) (i) compounds

**Fig. S8.** The energy spectrum of the R (-) or L (+) flame retardants in PLA. The EDS images of PDLA (a), PDLA/5%R(-) (d), PDLA/5%L(+) (g), PLLA (b), PLLA/5%R(-) (e), PDLA/5%L(+) (h), PMLA (c), PMLA/5%R(-) (f), PMLA/5%L(+) (i) compounds

**Fig. S9.** The digital images of carbon residues after cone calorimetry tests. The vertical (a1) and side view (a2) images of PDLA/5%R(-) compound; the vertical (b1) and side view (b2) images of PDLA/5%L(+) compound; the vertical (c1) and side view (c2) images of PLLA/5%R(-) compound; the vertical (d1) and side view (d2) images of PLLA/5%L(+) compound; the vertical (e1) and side view (e2) images of PMLA/5%R(-) compound; ; the vertical (f1) and side view (f2) images of PMLA/5%L(+) compound

**Fig. S10.** The SEM images of carbon residues after cone calorimetry test. The SEM images of PDLA/5%R(-) (a), PDLA/5%L(+) (d), PLLA/5%R(-) (b), PLLA/5%L(+) (e), PMLA/5%R(-) (c), and PMLA/5%L(+) (f) compounds

**Fig. S11.** The EDS results of carbon residues after cone calorimetry test. The EDS, phosphorus spectrum, and element contents of PDLA/5%R(-) (a1-a3), PDLA/5%L(+) (b1-b3), PLLA/5%R(-) (c1-c3), PLLA/5%L(+) (d1-d3), PMLA/5%R(-) (e1-e3), and PMLA/5%L(+) (f1-f3) compounds

**Fig. S12.** The Raman spectra of carbon residues after cone calorimetry test. The Raman results of PDLA/5%R(-) (a), PDLA/5%L(+) (b), PLLA/5%R(-) (c), PLLA/5%L(+) (d), PMLA/5%R(-) (e), and PMLA/5%L(+) (f) compounds

**Fig. S13.** The XPS results of carbon residues after cone calorimetry test. The XPS, C1s, O1s and P2p of PDLA/5%R(-) (a1-a4), PDLA/5%L(+) (b1-b4), PLLA/5%R(-) (c1-c4), PLLA/5%L(+) (d1-d4), PMLA/5%R(-) (e1-e4), and PMLA/5%L(+) (f1-f4) compound

**Fig. S14.** Pyrolysis behavior in vapor phase. Three dimensions degradation of PDLA/5%R(-) (a1), PDLA/5%L(+) (a2), PLLA/5%R(-) (b1), PLLA/5%L(+) (b2), PMLA/5%R(-) (c1), and PMLA/5%L(+) (c2) compounds. TG-FTIR curves of PLA PDLA/5%R(-) (d1), PDLA/5%L(+) (d2), PLLA/5%R(-) (e1), PLLA/5%L(+) (e2), PMLA/5%R(-) (f1), and PMLA/5%L(+) (f2) compounds at different temperatures; the hydrocarbons (g), aldehydes (h), and carbonyl compounds (i) at different temperatures

**Fig. S15.** The Py-GSMS results of (R)-(-)-1,1'-binaphthyl-2,2'-diyl hydrogen phosphate (R (-) flame retardant), and (S)-(+)-1,1'-binaphthyl-2,2'-diyl hydrogen phosphate (L (+) flame retardant), the keep time of R (-) and L (+) flame retardants (a), the main mass spectrometry of R (-) and L (+) flame retardants (b-e)

## 2. Table captions

**Table S1.** Formula of functional PLA composites

**Table S2.** The results of functional PLA composites in UL-94 and LOI tests

**Table S3.** The cone calorimeter results of functional PLA composites

**Table S4.** The non-isothermal crystallization results of functional PLA composites

**Table S5.** The isothermal crystallization results of functional PDLA composites

**Table S6.** The isothermal crystallization results of functional PLLA composites

**Table S7.** Related thermal stability data for functional PLA composites under N<sub>2</sub>

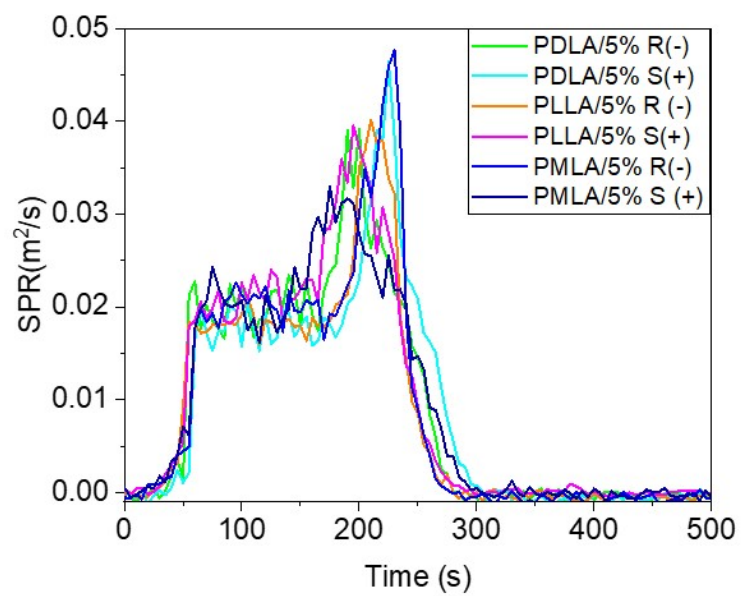

**Fig. S1.** The SPR curves of PLA/5% R (-) and PLA/5% L (+) compounds

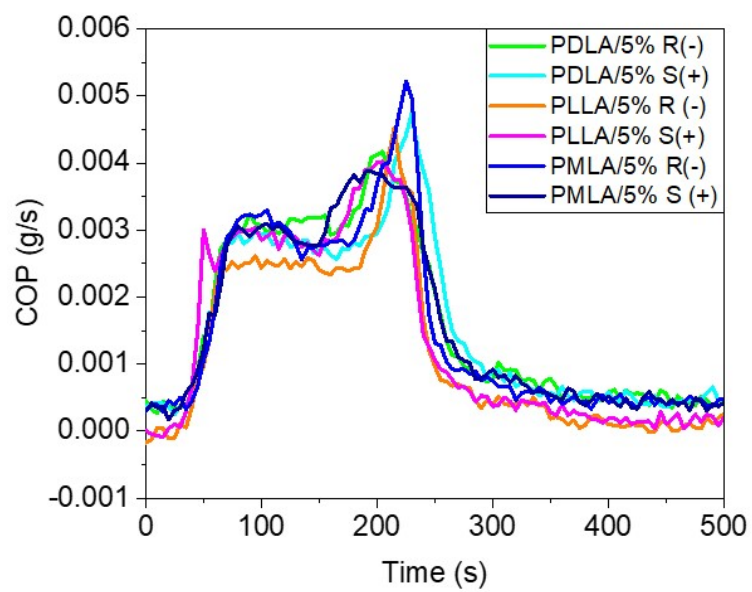

**Fig. S2.** The COP curves of PLA/5% R(-) and PLA/5% L(+) compounds

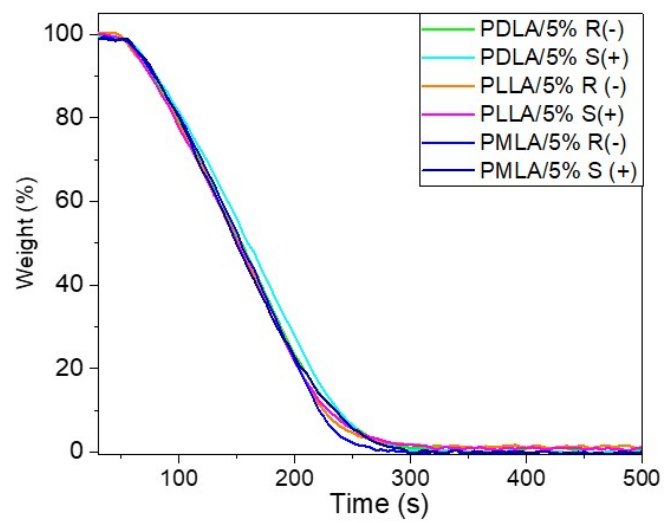

**Fig. S3.** The weight loss curves of PLA/5%R(-) and PLA/5%L(+) compounds

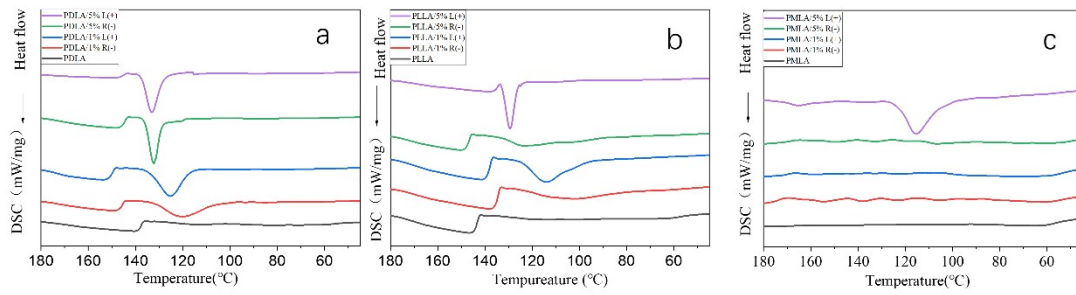

**Fig. S4.** Crystallization curves of PDLA with R(-)/L(+) compounds (a), PLLA with R(-)/L(+) compounds (b) and PMLA with R(-)/L(+) compounds (c)

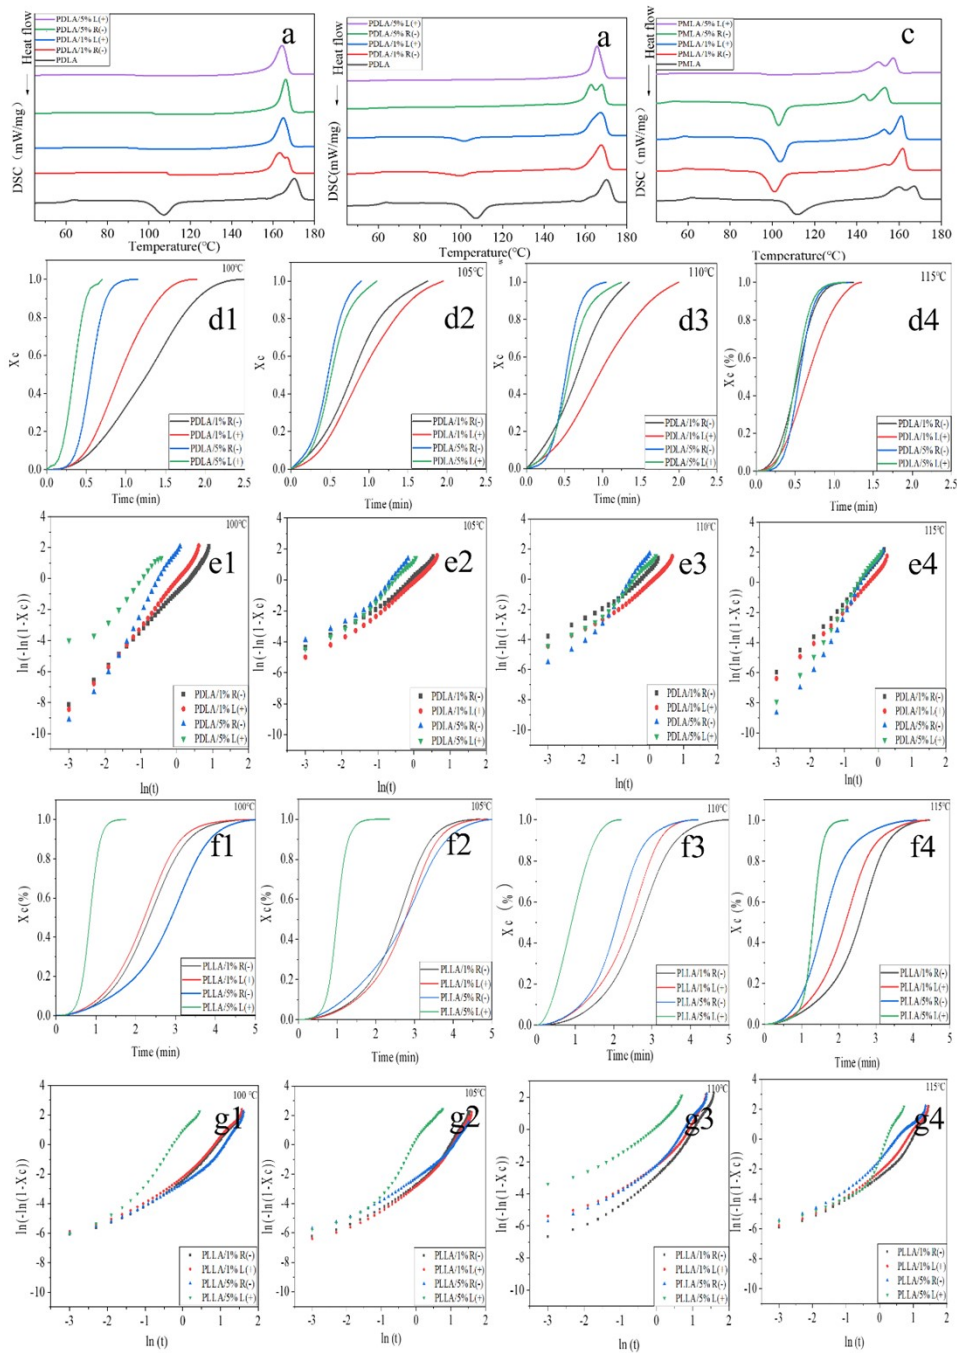

**Fig. S5.** The crystallinity of PLA with R(-) or PLA/L(+) compounds. Melting behaviors of PDLA with R(-)/L(+) compounds (a), PLLA with R(-)/L(+) compounds (b) and PMLA with R(-)/L(+) compounds (c). The isothermal crystallinity of PLA with R(-) or PLA/L(+) compounds at different temperatures (d1-e4). The curves  $\ln(-\ln(1-X(t)))$  and  $\ln(t)$  of PLA with R(-) or PLA/L(+) compounds at different temperatures (f1-g4)

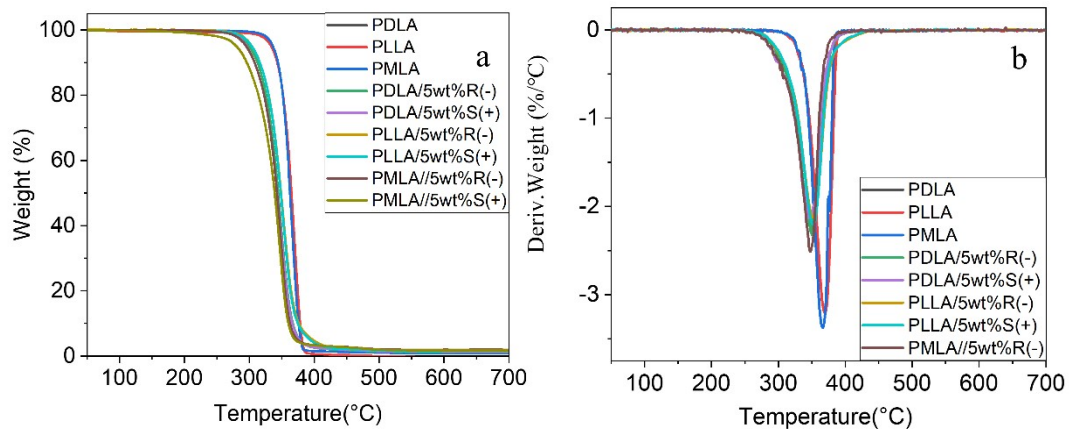

**Fig. S6.** TGA (a) and DTG (b) curves of PDLA with R(-)/L(+), PLLA with R(-)/L(+), and PMLA with R(-)/L(+) compounds



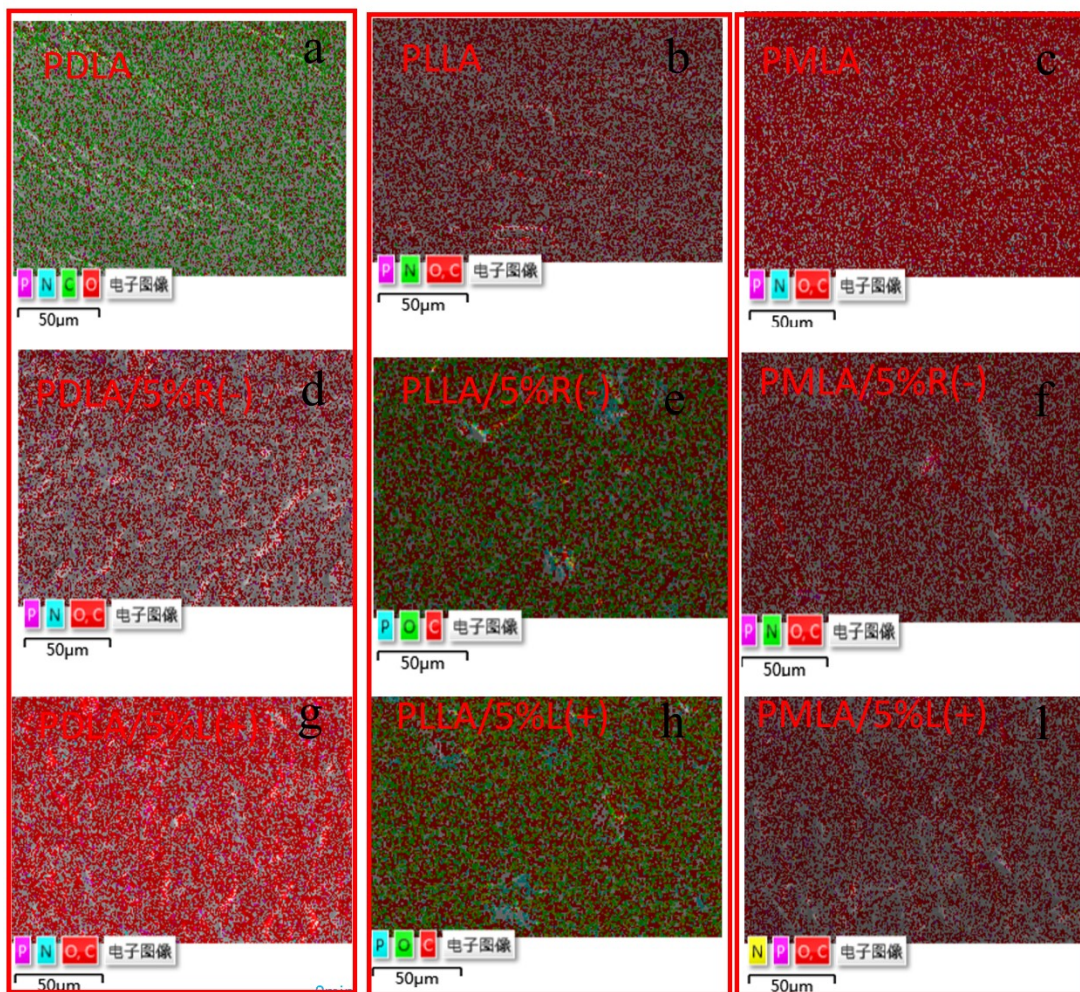

**Fig. S8.** The energy spectrum of the R (-) or L (+) flame retardants in PLA. The EDS images of PDLA (a), PDLA/5%R(-) (d), PDLA/5%L(+)(g), PLLA (b), PLLA/5%R(-) (e), PDLA/5%L(+)(h), PMLA (c), PMLA/5%R(-) (f), PLMA/5%L(+)(i) compounds

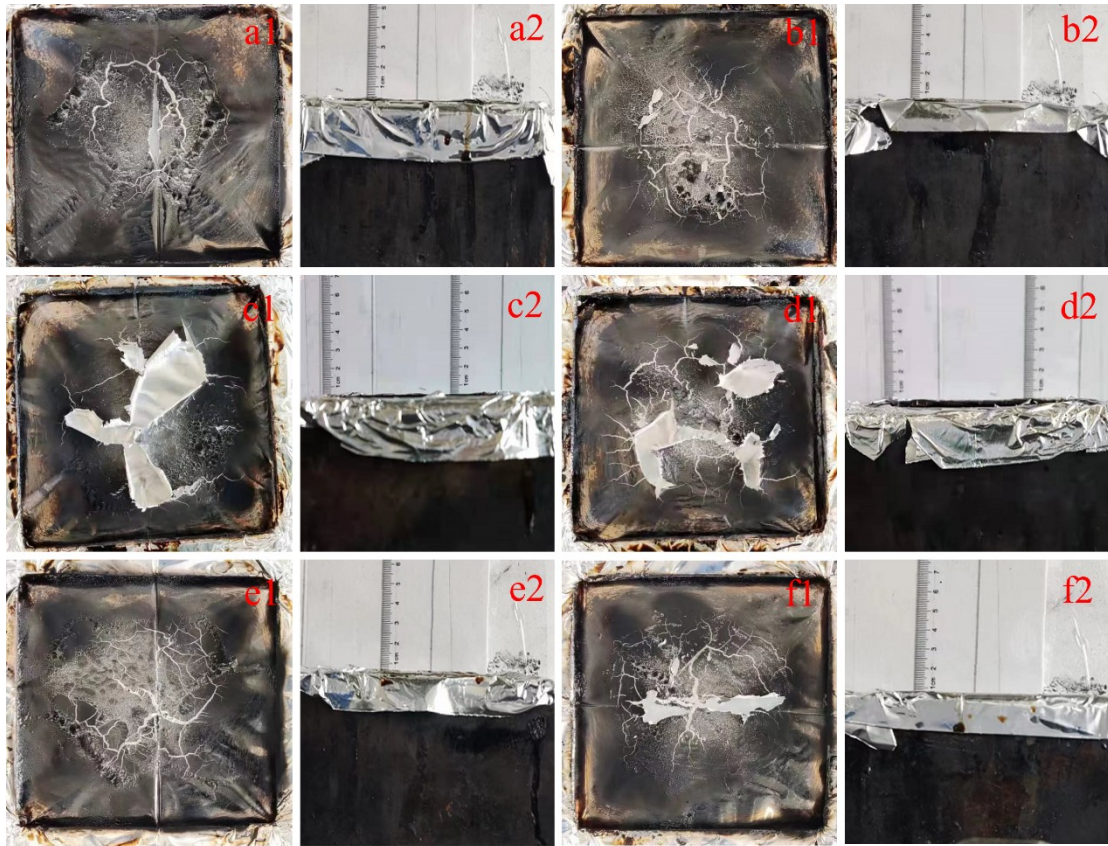

**Fig. S9.** The digital images of carbon residues after cone calorimetry tests. The vertical (a1) and side view (a2) images of PDLA/5%R(-) compound; the vertical (b1) and side view (b2) images of PDLA/5%L(+) compound; the vertical (c1) and side view (c2) images of PLLA/5%R(-) compound; the vertical (d1) and side view (d2) images of PLLA/5%L(+) compound; the vertical (e1) and side view (e2) images of PMLA/5%R(-) compound; ; the vertical (f1) and side view (f2) images of PMLA/5%L(+) compound

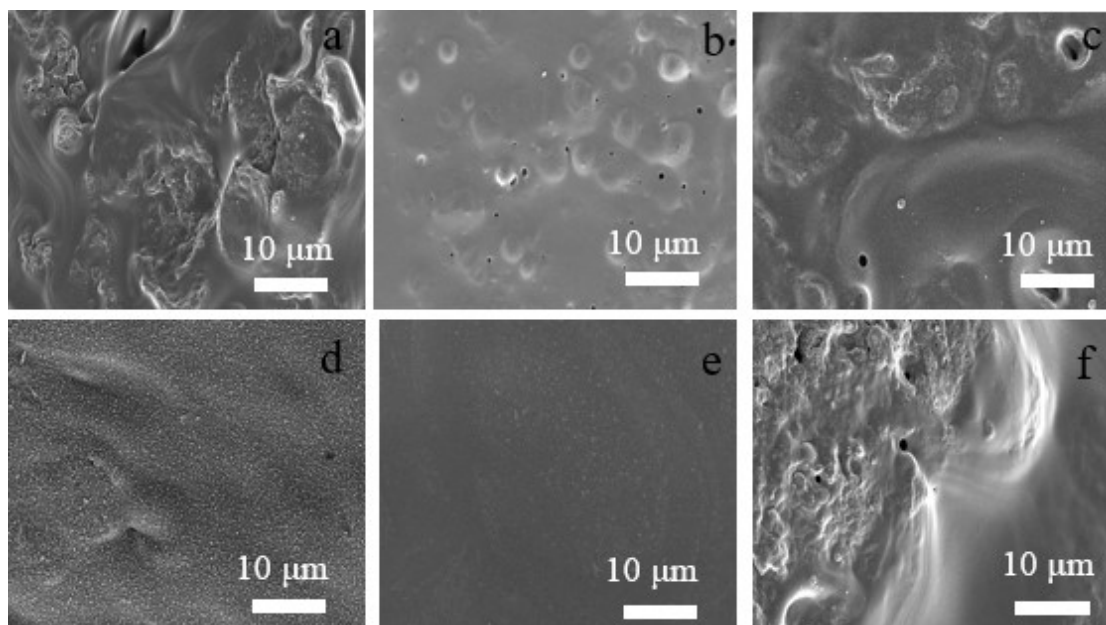

**Fig. S10.** The SEM images of carbon residues after cone calorimetry test. The SEM images of PDLA/5%R(-) (a), PDLA/5%L(+) (d), PLLA/5%R(-) (b), PLLA/5%L(+) (e), PMLA/5%R(-) (c), and PMLA/5%L(+) (f) compounds

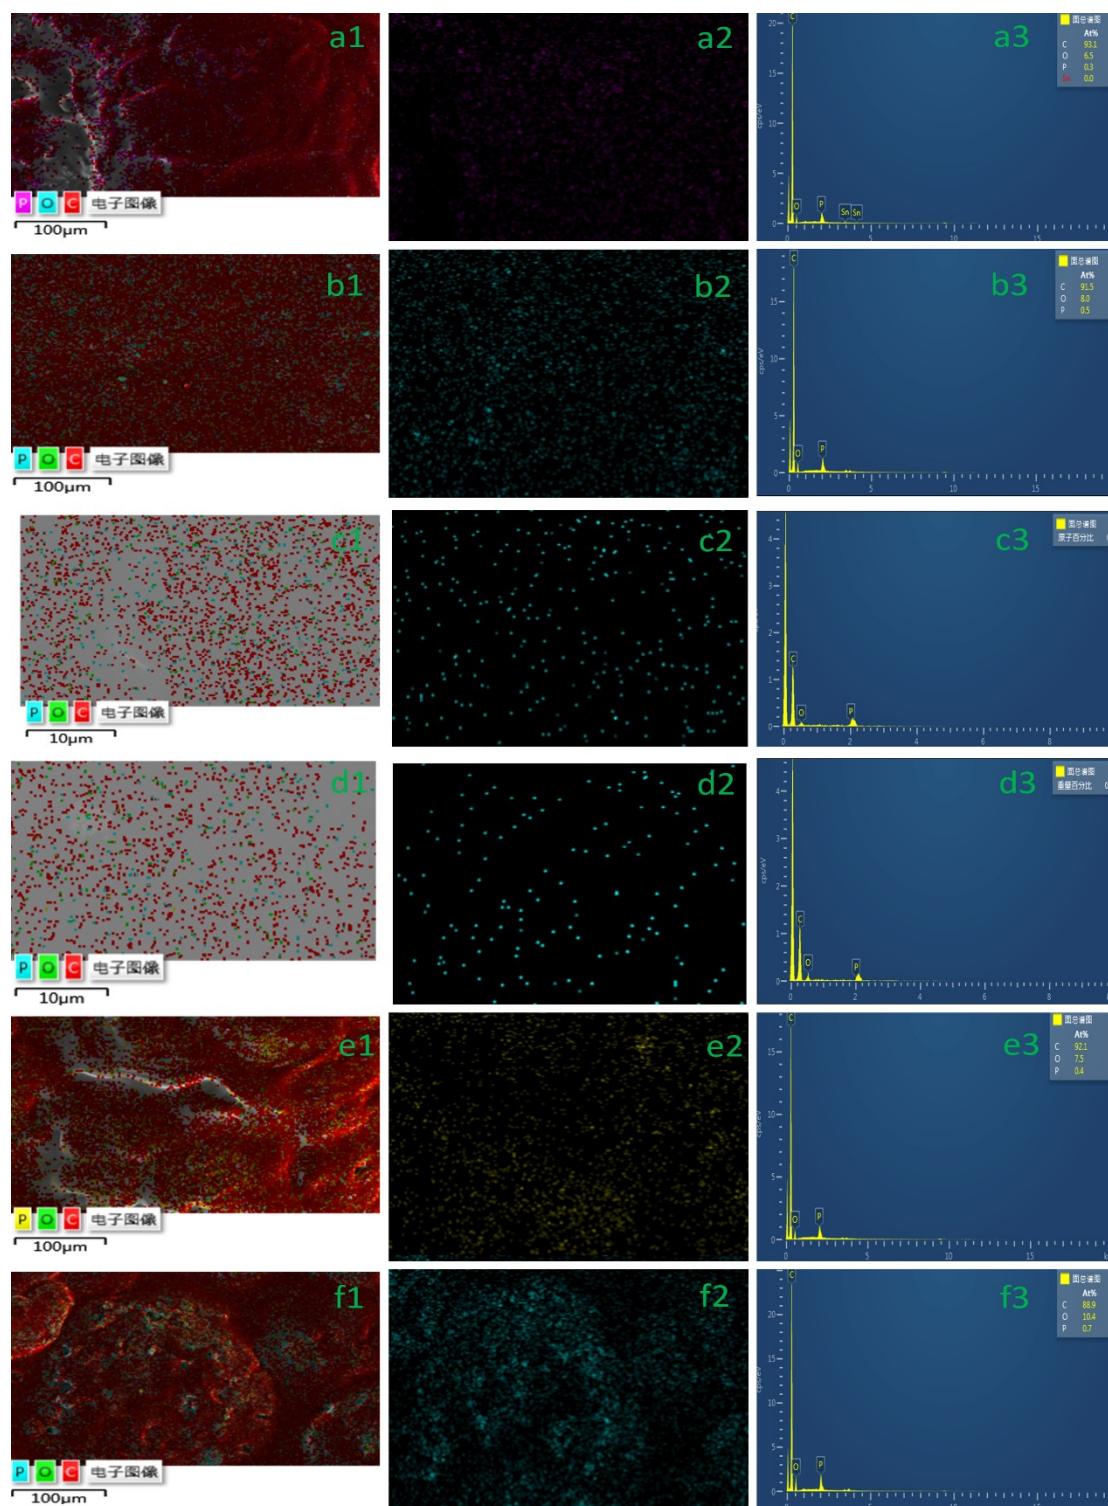

**Fig. S11.** The EDS results of carbon residues after cone calorimetry test. The EDS, phosphorus spectrum, and element contents of PDLA/5%R(-) (a1-a3), PDLA/5%L(+), PLLA/5%R(-) (c1-c3), PLLA/5%L(+), PMLA/5%R(-) (e1-e3), and PMLA/5%L(+), (f1-f3) compounds

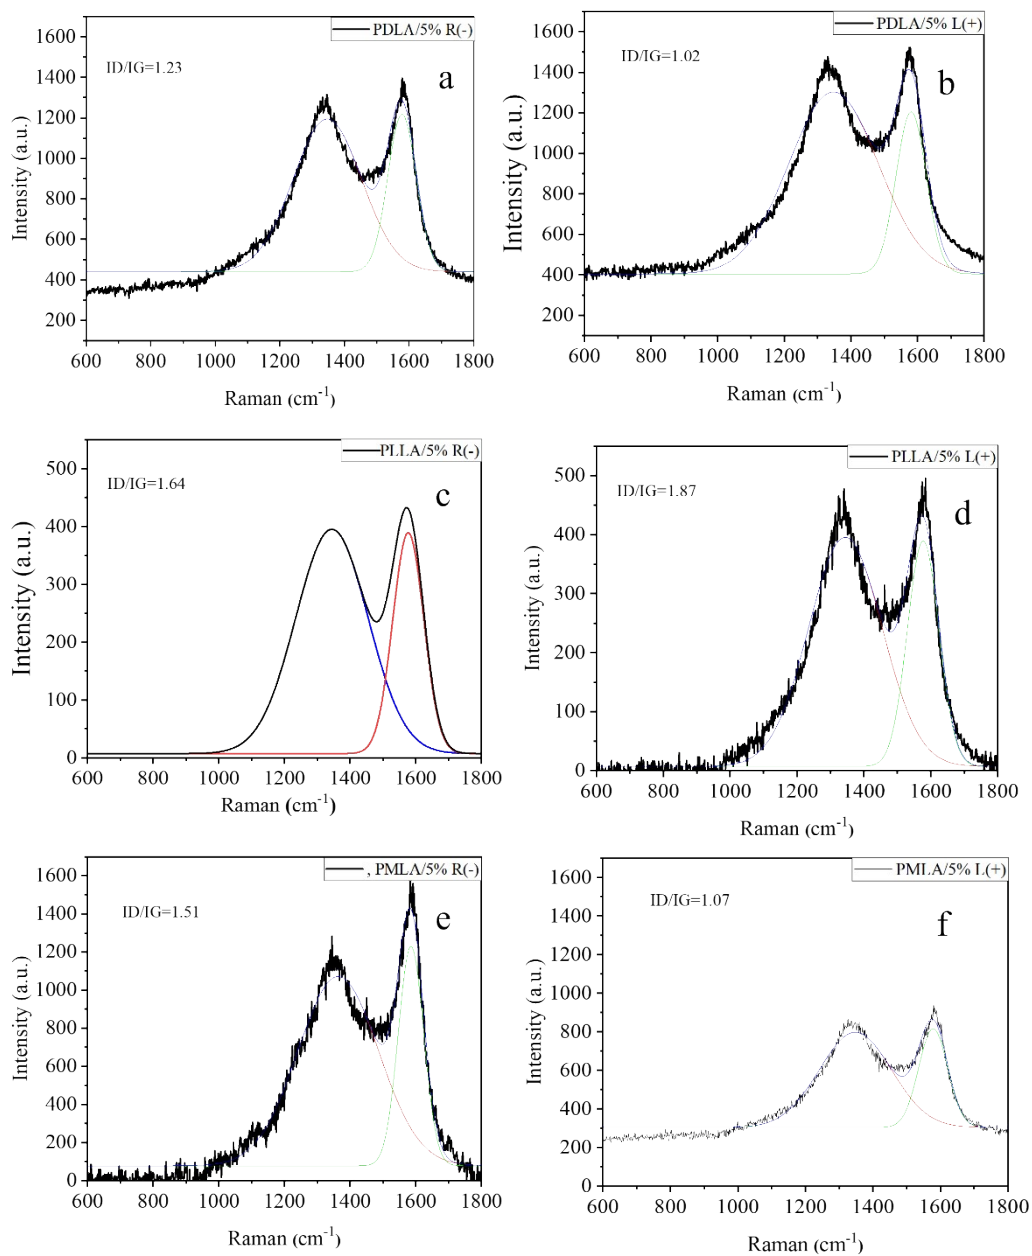

**Fig. S12.** The Raman spectra of carbon residues after cone calorimetry test. The Raman results of PDLA/5%R(-) (a), PDLA/5%L(+) (b), PLLA/5%R(-) (c), PLLA/5%L(+) (d), PMLA/5%R(-) (e), and PMLA/5%L(+) (f) compounds

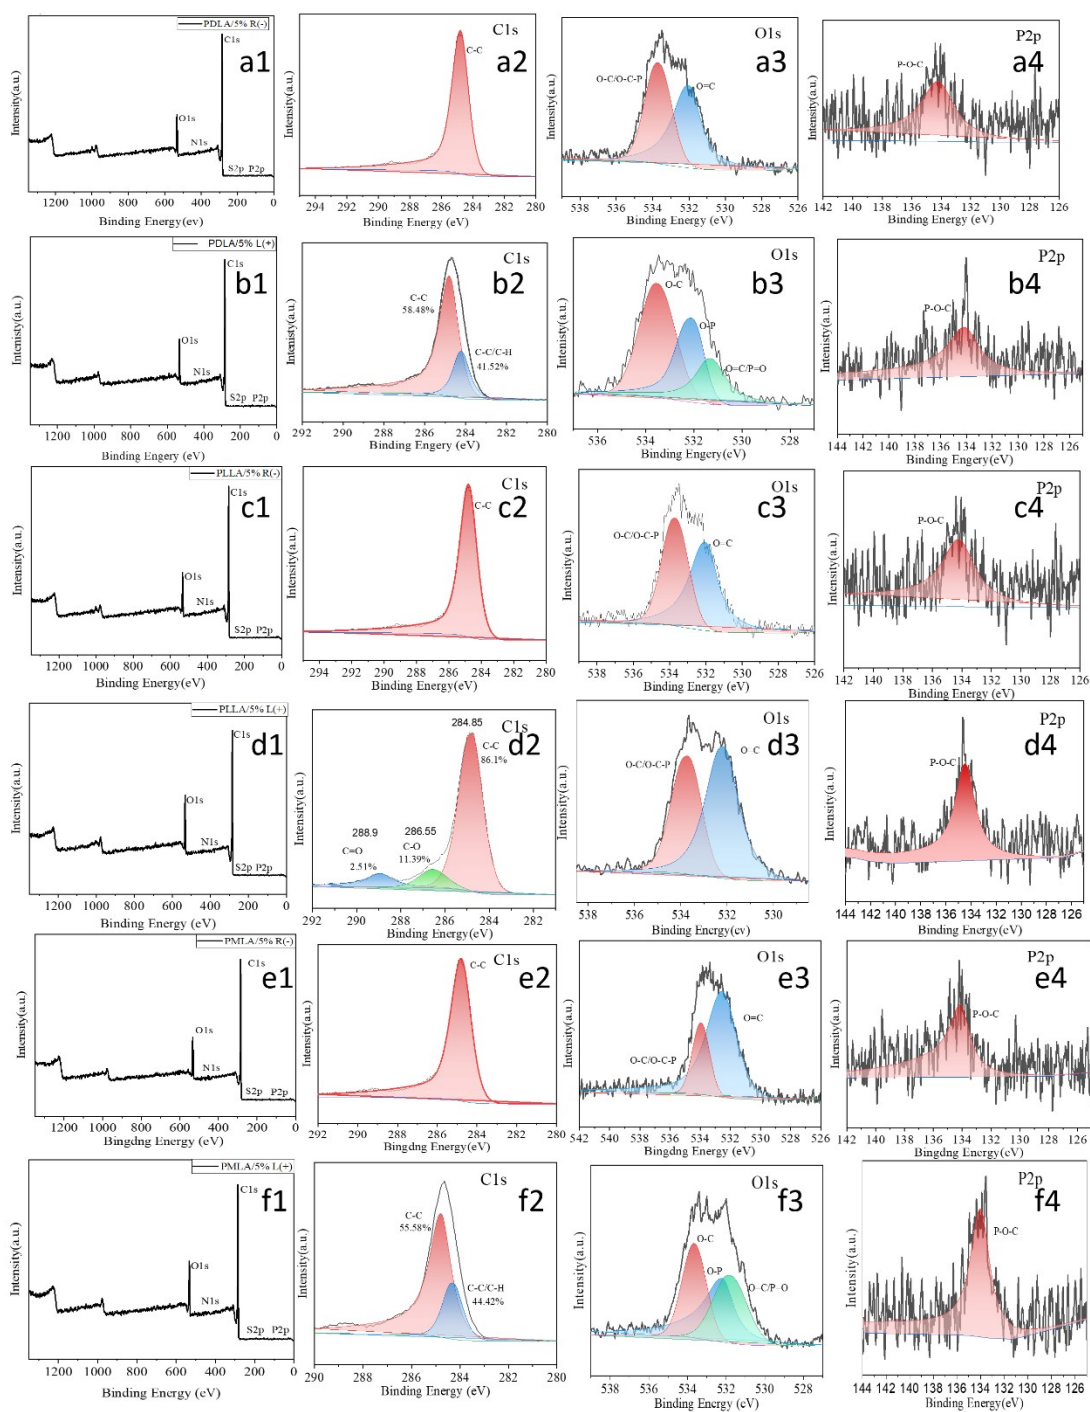

**Fig. S13.** The XPS results of carbon residues after cone calorimetry test. The XPS, C1s, O1s and P2p of PDLA/5%R(-) (a1-a4), PDLA/5%L(+) (b1-b4), PLLA/5%R(-) (c1-c4), PLLA/5%L(+) (d1-d4), PMLA/5%R(-) (e1-e4), and PMLA/5%L(+) (f1-f4) compounds

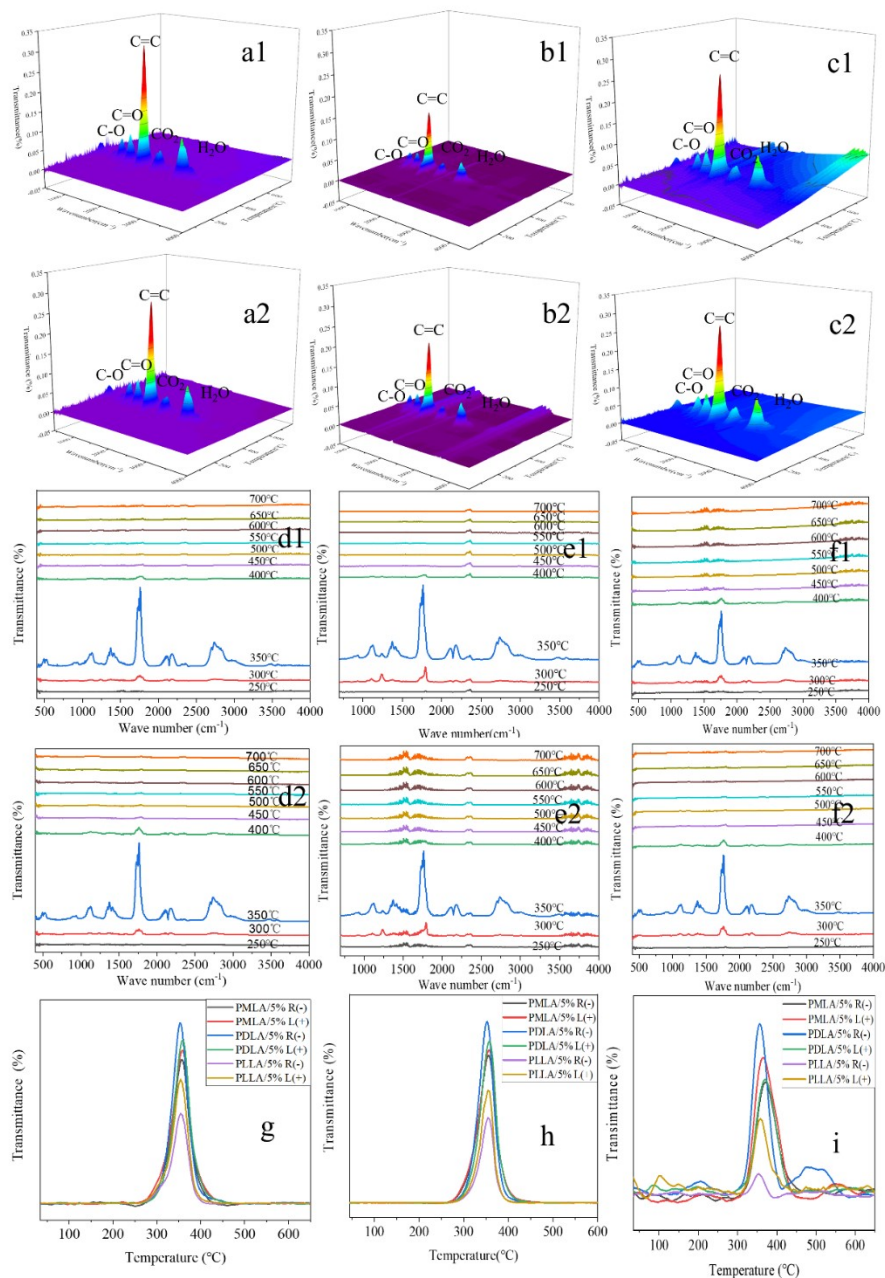

**Fig. S14.** Pyrolysis behavior in vapor phase. Three dimensions degradation of PDLA/5%R(-) (a1), PDLA/5%L(+)(a2), PLLA/5%R(-) (b1), PLLA/5%L(+)(b2), PMLA/5%R(-) (c1), and PMLA/5%L(+)(c2) compounds. TG-FTIR curves of PLA PDLA/5%R(-) (d1), PDLA/5%L(+)(d2), PLLA/5%R(-) (e1), PLLA/5%L(+)(e2), PMLA/5%R(-) (f1), and PMLA/5%L(+)(f2) compounds at different temperatures; the hydrocarbons (g), aldehydes (h), and carbonyl compounds (i) at different temperatures

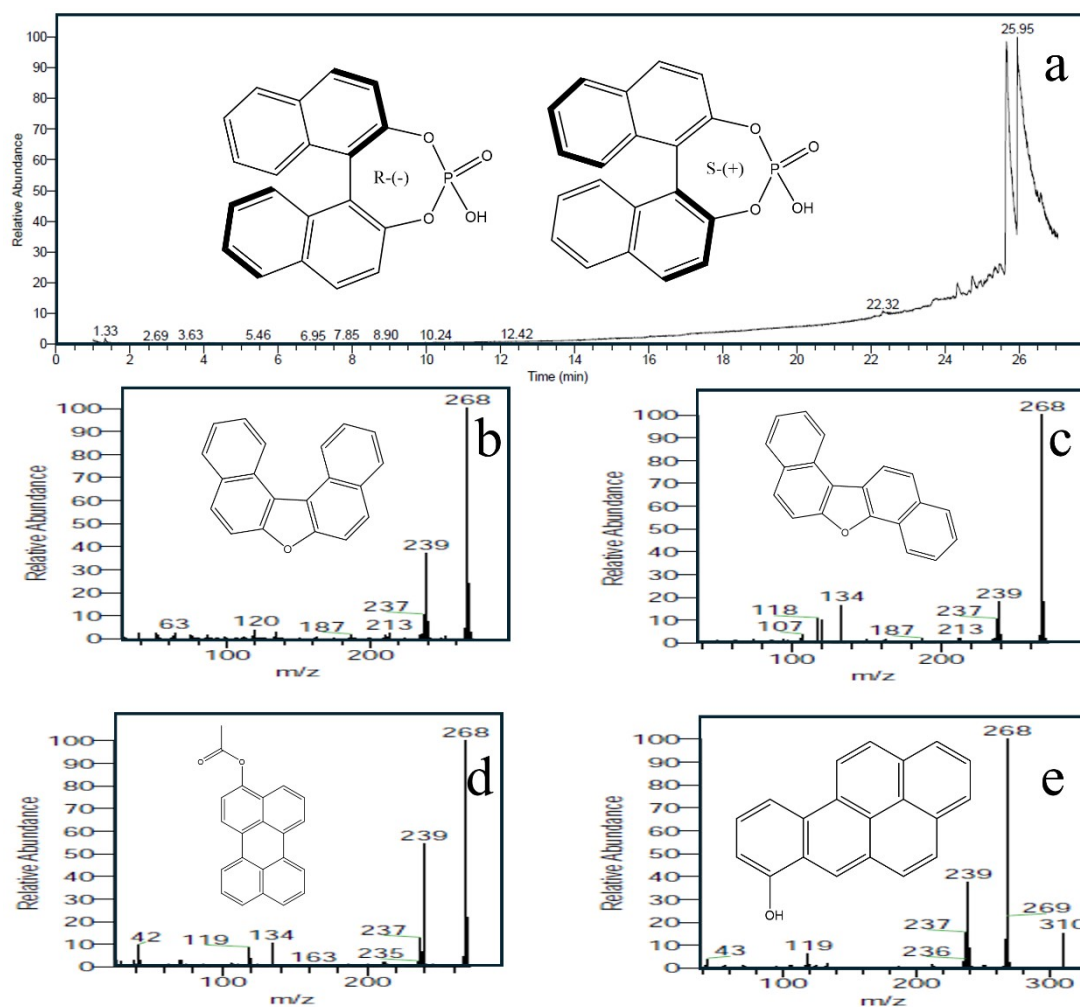

**Fig. S15.** The Py-GSMS results of (R)-(-)-1,1'-binaphthyl-2,2'-diyl hydrogen phosphate (R (-) flame retardant), and (S)-(+)-1,1'-binaphthyl-2,2'-diyl hydrogen phosphate (L (+) flame retardant), the keep time of R (-) and L (+) flame retardants (a), the main mass spectrometry of R (-) and L (+) flame retardants (b-e)

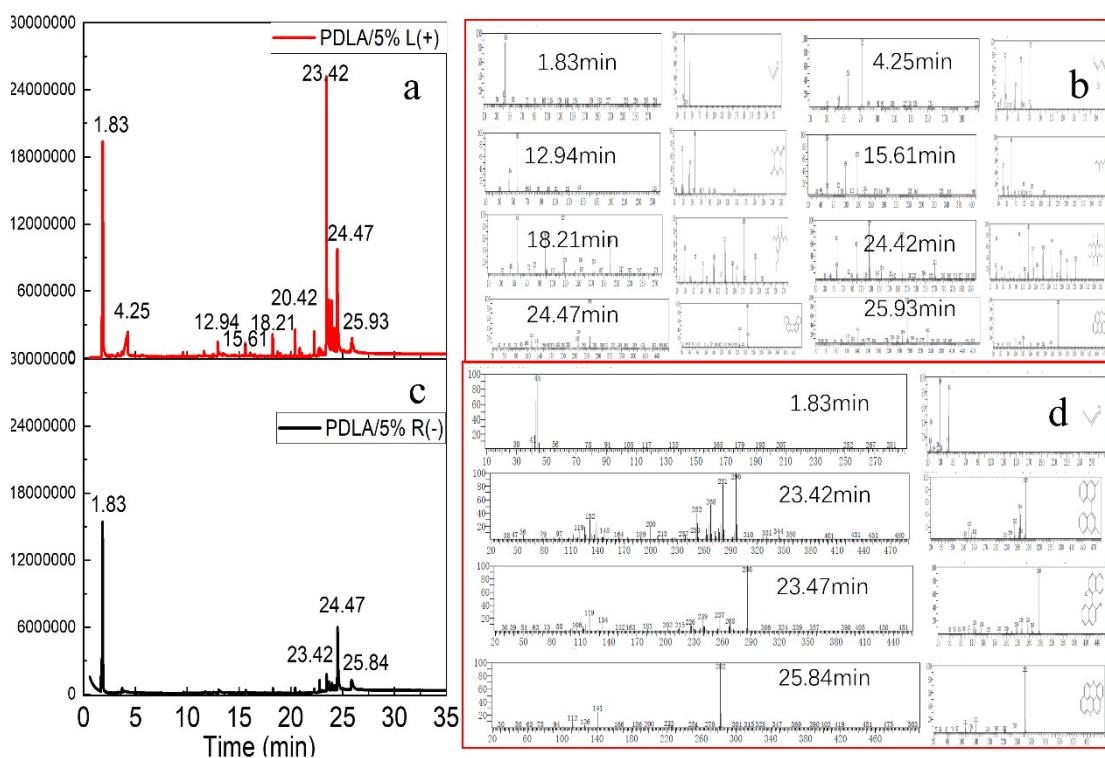

**Fig. S16.** The Py-GSMS results of PDLA/5%R(-) and PDLA/5%L(+) compounds. The keep time of PDLA/5%R(-) (c) and PDLA/5%L(+) compounds (a), the main mass spectrometry of PDLA/5%R(-) (d) and PDLA/5%L(+) compounds (b)

**Table S1.** Formula of functional PLA composites

| Samples     | Components (wt%) |      |   |   | FR loading<br>(wt%) | P Contents<br>(wt%)  |
|-------------|------------------|------|---|---|---------------------|----------------------|
|             | PDLA             | PLLA | R | S |                     |                      |
| PDLA        | 100              | 0    | 0 | 0 | 0                   | 0                    |
| PLLA        | 0                | 100  | 0 | 0 | 0                   | 0                    |
| PMLA        | 50               | 50   | 0 | 0 | 0                   | 0                    |
| PDLA/1%R(-) | 99               | 0    | 1 | 0 | 1                   | $8.9 \times 10^{-4}$ |
| PDLA/1%L(+) | 99               | 0    | 0 | 1 | 1                   | $8.9 \times 10^{-4}$ |
| PDLA/5%R(-) | 95               | 0    | 5 | 0 | 5                   | $4.4 \times 10^{-3}$ |
| PDLA/5%L(+) | 95               | 0    | 0 | 5 | 5                   | $4.4 \times 10^{-3}$ |
| PLLA/1%R(-) | 0                | 99   | 1 | 0 | 1                   | $8.9 \times 10^{-4}$ |
| PLLA/1%L(+) | 0                | 99   | 0 | 1 | 1                   | $8.9 \times 10^{-4}$ |
| PLLA/5%R(-) | 0                | 95   | 5 | 0 | 5                   | $4.4 \times 10^{-3}$ |
| PLLA/5%L(+) | 0                | 95   | 0 | 5 | 5                   | $4.4 \times 10^{-3}$ |
| PMLA/1%R(-) | 49.5             | 49.5 | 1 | 0 | 1                   | $8.9 \times 10^{-4}$ |
| PMLA/1%L(+) | 49.5             | 49.5 | 0 | 1 | 1                   | $8.9 \times 10^{-4}$ |
| PMLA/5%R(-) | 47.5             | 47.5 | 5 | 0 | 5                   | $4.4 \times 10^{-3}$ |
| PMLA/5%L(+) | 47.5             | 47.5 | 0 | 5 | 5                   | $4.4 \times 10^{-3}$ |

**Table S2.** The results of functional PLA composites in UL-94 and LOI tests

| Samples     | FR loading<br>(wt%) | P<br>Contents<br>(wt%) | UL-94                     |          |        | LOI<br>(%) |
|-------------|---------------------|------------------------|---------------------------|----------|--------|------------|
|             |                     |                        | $\bar{t}_1/\bar{t}_2$ (s) | Ignition | Rating |            |
| PDLA        | 0                   | 0                      | > 30s/-                   | Y        | NO*    | 19.5±0.0   |
| PLLA        | 0                   | 0                      | > 30s/-                   | Y        | NO*    | 19.5±0.0   |
| PMLA        | 0                   | 0                      | > 30s/-                   | Y        | NO*    | 19.5±0.1   |
| PDLA/1%R(-) | 1                   | 8.9×10 <sup>-4</sup>   | 1.41s/1.23s               | N        | V-0    | 28.0±0.1   |
| PDLA/1%L(+) | 1                   | 8.9×10 <sup>-4</sup>   | 1.21s/1.14s               | N        | V-0    | 28.5±0.2   |
| PDLA/5%R(-) | 5                   | 4.4×10 <sup>-3</sup>   | 0.89s/0.72s               | N        | V-0    | 34.0±0.1   |
| PDLA/5%L(+) | 5                   | 4.4×10 <sup>-3</sup>   | 0.81s/0.69s               | N        | V-0    | 34.5±0.2   |
| PLLA/1%R(-) | 1                   | 8.9×10 <sup>-4</sup>   | 1.23s/1.20s               | N        | V-0    | 29.4±0.1   |
| PLLA/1%L(+) | 1                   | 8.9×10 <sup>-4</sup>   | 1.53s/1.42s               | N        | V-0    | 27.5±0.1   |
| PLLA/5%R(-) | 5                   | 4.4×10 <sup>-3</sup>   | 0.54s/0.62s               | N        | V-0    | 40.8±0.2   |
| PLLA/5%L(+) | 5                   | 4.4×10 <sup>-3</sup>   | 1.01s/1.13s               | N        | V-0    | 30.9±0.1   |
| PMLA/1%R(-) | 1                   | 8.9×10 <sup>-4</sup>   | 1.15s/1.02s               | N        | V-0    | 30.5±0.1   |
| PMLA/1%L(+) | 1                   | 8.9×10 <sup>-4</sup>   | 1.02s/0.92s               | N        | V-0    | 32.0±0.2   |
| PMLA/5%R(-) | 5                   | 4.4×10 <sup>-3</sup>   | 0.94s/1.01s               | N        | V-0    | 34.5±0.2   |
| PMLA/5%L(+) | 5                   | 4.4×10 <sup>-3</sup>   | 0.83s/0.92s               | N        | V-0    | 36.0±0.1   |

\* NO: no rating in UL-94 test

**Table S3.** The cone calorimeter results of functional PLA composites

| Samples     | HRR<br>(kW/m <sup>2</sup> ) | THR<br>(MJ//m <sup>2</sup> ) | SPR<br>(m <sup>2</sup> /s) | TSP<br>(m <sup>2</sup> ) | COP<br>(g/s) | CO <sub>2</sub> P<br>(g/s) |
|-------------|-----------------------------|------------------------------|----------------------------|--------------------------|--------------|----------------------------|
| PDLA/5%R(-) | 370                         | 63.7                         | 0.039                      | 4.71                     | 0.003        | 0.30                       |
| PDLA/5%L(+) | 370                         | 65.2                         | 0.046                      | 4.65                     | 0.004        | 0.28                       |
| PLLA/5%R(-) | 386                         | 63.9                         | 0.038                      | 4.40                     | 0.004        | 0.30                       |
| PLLA/5%L(+) | 383                         | 63.3                         | 0.042                      | 4.91                     | 0.004        | 0.31                       |
| PMLA/5%R(-) | 405                         | 64.2                         | 0.047                      | 4.72                     | 0.005        | 0.37                       |
| PMLA/5%L(+) | 396                         | 64.0                         | 0.031                      | 4.83                     | 0.003        | 0.36                       |

**Table S4.** The non-isothermal crystallization results of functional PLA composites

| Samples     | T <sub>g</sub><br>(°C) | T <sub>cc</sub><br>(°C) | T <sub>m</sub><br>(°C) | ΔH <sub>cc</sub><br>(J/g) | X <sub>c</sub><br>(%) |
|-------------|------------------------|-------------------------|------------------------|---------------------------|-----------------------|
| PDLA        | 63.6                   | 106.9                   | 171.2                  | 35.53                     | 1.4                   |
| PLLA        | 63.8                   | 107.3                   | 170.3                  | 36.64                     | 1.5                   |
| PMLA        | 62.5                   | 110.7                   | 158.9/166.5            | 34.26                     | 0.8                   |
| PDLA/1%R(-) | 61.2                   | 107.1                   | 163.2                  | 33.39                     | 36.03                 |
| PDLA/1%L(+) | 59.7                   | 95.5                    | 166.1                  | 39.68                     | 42.82                 |
| PDLA/5%R(-) | 62.6                   | 101.2                   | 165.0                  | 34.1                      | 38.24                 |
| PDLA/5%L(+) | 59.4                   | 94.0                    | 164.4                  | 40.13                     | 45.13                 |
| PLLA/1%R(-) | 59.5                   | 99.6                    | 167.6                  | 39.58                     | 37.56                 |
| PLLA/1%L(+) | 59.4                   | 100.5                   | 167.1                  | 37.78                     | 35.39                 |
| PLLA/5%R(-) | 58.6                   | 95.6                    | 162.6/167.6            | 39.08                     | 43.95                 |
| PLLA/5%L(+) | 58.5                   | 98.8                    | 165.6                  | 37.59                     | 42.27                 |
| PMLA/1%R(-) | 60.5                   | 111.9                   | 160/167                | 36.86                     | 4.20                  |
| PMLA/1%L(+) | 58.1                   | 101.0                   | 152.4/161.7            | 36.1                      | 7.36                  |
| PMLA/5%R(-) | 57.1                   | 103.7                   | 153/161.1              | 39.98                     | 7.89                  |
| PMLA/5%L(+) | 53.6                   | 103.0                   | 143.2/153.2            | 31.68                     | 9.12                  |

**Table S5.** The isothermal crystallization results of functional PDLA composites

| Samples     | T (°C) | n    | lnk      | k                    | t <sub>1/2</sub> |
|-------------|--------|------|----------|----------------------|------------------|
| PDLA/1%R(-) | 100°C  | 2.56 | -0.80717 | 4.5×10 <sup>-1</sup> | 1.27             |
|             | 105°C  | 1.75 | 0.19211  | 1.21                 | 0.79             |
|             | 110°C  | 1.63 | 0.48013  | 1.62                 | 0.67             |
|             | 115°C  | 2.63 | 1.43917  | 4.22                 | 0.53             |
| PDLA/1%L(+) | 100°C  | 2.91 | -0.13051 | 8.8×10 <sup>-1</sup> | 0.97             |
|             | 105°C  | 1.91 | -0.081   | 9.2×10 <sup>-1</sup> | 0.90             |
|             | 110°C  | 1.71 | -0.15151 | 8.6×10 <sup>-1</sup> | 0.95             |
|             | 115°C  | 2.49 | 0.70545  | 2.02                 | 0.66             |
| PDLA/5%R(-) | 100°C  | 3.89 | 1.74876  | 5.74                 | 0.56             |
|             | 105°C  | 1.98 | 1.25065  | 3.49                 | 0.47             |
|             | 110°C  | 2.72 | 1.44851  | 4.26                 | 0.53             |
|             | 115°C  | 3.72 | 1.64569  | 5.18                 | 0.56             |
| PDLA/5%L(+) | 100°C  | 2.39 | 2.27944  | 9.77                 | 0.34             |
|             | 105°C  | 2.11 | 1.08136  | 2.95                 | 0.53             |
|             | 110°C  | 2.10 | 0.92691  | 2.53                 | 0.56             |
|             | 115°C  | 3.39 | 1.78669  | 5.97                 | 0.52             |

**Table S6.** The isothermal crystallization results of functional PLLA composites

| Samples     | T (°C) | n    | lnk      | k                     | t <sub>1/2</sub> |
|-------------|--------|------|----------|-----------------------|------------------|
| PLLA        | 100    | 2.32 | -2.47    | 8.64×10 <sup>-2</sup> | 2.48             |
|             | 105    | 2.34 | -2.45    | 8.60×10 <sup>-2</sup> | 2.44             |
|             | 110    | 2.26 | -1.14    | 3.20×10 <sup>-1</sup> | 1.41             |
|             | 115    | 2.36 | -2.41    | 9.00×10 <sup>-2</sup> | 2.38             |
| PLLA/1%R(-) | 100    | 2.20 | -1.88624 | 1.52×10 <sup>-1</sup> | 2.35             |
|             | 105    | 2.25 | -2.10087 | 1.22×10 <sup>-1</sup> | 1.05             |
|             | 110    | 2.33 | -2.34343 | 9.56×10 <sup>-2</sup> | 2.7              |
|             | 115    | 2.09 | -1.9591  | 1.41×10 <sup>-1</sup> | 2.6              |
| PLLA/1%L(+) | 100    | 2.15 | -1.68347 | 1.86×10 <sup>-1</sup> | 2.2              |
|             | 105    | 2.27 | -2.2667  | 1.04×10 <sup>-1</sup> | 1.1              |
|             | 110    | 1.99 | -1.68758 | 1.85×10 <sup>-1</sup> | 2.45             |
|             | 115    | 2.10 | -1.63426 | 1.95×10 <sup>-1</sup> | 2.2              |
| PLLA/5%R(-) | 100    | 2.06 | -2.17288 | 1.13×10 <sup>-1</sup> | 2.9              |
|             | 105    | 1.85 | -1.93064 | 1.45×10 <sup>-1</sup> | 2.8              |
|             | 110    | 2.16 | -1.58073 | 2.06×10 <sup>-1</sup> | 2.1              |
|             | 115    | 2.05 | -1.04996 | 3.49×10 <sup>-1</sup> | 1.6              |
| PLLA/5%L(+) | 100    | 2.79 | 0.7024   | 2.06                  | 0.85             |
|             | 105    | 2.75 | 0.18935  | 1.21                  | 1.0              |
|             | 110    | 1.60 | 0.34358  | 1.41                  | 0.9              |
|             | 115    | 2.54 | -0.65866 | 5.16×10 <sup>-1</sup> | 1.3              |

**Table S7.** Related thermal stability data for functional PLA composites under N<sub>2</sub>.

| Samples     | T <sub>.5%</sub><br>(°C) | T <sub>max</sub><br>(°C) | R <sub>max</sub><br>(%/K) | Residual (%) |       |       |
|-------------|--------------------------|--------------------------|---------------------------|--------------|-------|-------|
|             |                          |                          |                           | 500°C        | 600°C | 700°C |
| PDLA        | 333                      | 369                      | 3.14                      | 0.13         | 0.05  | 0.03  |
| PLLA        | 332                      | 369                      | 3.15                      | 0.12         | 0.04  | 0.02  |
| PMLA        | 336                      | 366                      | 3.37                      | 1.21         | 0.83  | 0.75  |
| PDLA/5%R(-) | 300                      | 350                      | 2.32                      | 1.41         | 1.22  | 1.03  |
| PDLA/5%L(+) | 296                      | 345                      | 2.13                      | 1.55         | 1.39  | 1.24  |
| PLLA/5%R(-) | 302                      | 351                      | 2.12                      | 2.00         | 1.71  | 1.69  |
| PLLA/5%L(+) | 302                      | 352                      | 2.21                      | 1.78         | 1.54  | 1.53  |
| PMLA/5%R(-) | 296                      | 347                      | 2.51                      | 2.07         | 1.96  | 1.82  |
| PMLA/5%L(+) | 279                      | 347                      | 2.25                      | 1.95         | 1.77  | 1.73  |
